# Supplementary material for: Peripheral blood T-cell signatures from high-resolution immune phenotyping of γδ and αβ T-cells in younger and older subjects in the Berlin Aging Study II
Source: PubMed Central journal article supplement (PMC4670504; doi:10.1186/s12979-015-0052-x), 2015-12-04

**Peripheral blood T-cell reference values from high-resolution immune phenotyping of  $\gamma\delta$  and  $\alpha\beta$  T-cells in younger and older subjects in the Berlin Aging Study II**

Kilian Wistuba-Hamprecht, Karin Haehnel, Nicole Janssen, Ilja Demuth, Graham Pawelec

**Supplementary Material**

**Table S1: Results of Mann-Whitney comparisons of the  $\gamma\delta$  T-cell compartments and subsets.**

p-values and median frequencies are displayed for young CMV-seropositive (yCMV+), young CMV-seronegative (yCMV-), old CMV-seropositive (oCMV+) and old CMV-seronegative (oCMV-).

| phenotype                                          |                    | yCMV- vs oCMV- | yCMV+ vs oCMV+ | yCMV- vs yCMV+ | oCMV- vs oCMV+ | yCMV- vs oCMV+ | oCMV- vs yCMV+ |
|----------------------------------------------------|--------------------|----------------|----------------|----------------|----------------|----------------|----------------|
| $\gamma\delta$ T-cells/CD3+                        | p-value            | < 0.0001       | 0.4865         | 0.2179         | 0.353          | 0.0057         | 0.156          |
|                                                    | median frequencies | 3.84 2.13      | 2.58 2.31      | 3.84 2.58      | 2.13 2.31      | 3.84 2.31      | 2.13 2.58      |
| V $\delta$ 2+/ $\gamma\delta$ T-cells              | p-value            | 0.1438         | 0.0691         | 0.2976         | < 0.0001       | < 0.0001       | 0.726          |
|                                                    | median frequencies | 71.49 66.30    | 68.61 37.88    | 71.49 68.61    | 66.30 37.88    | 71.49 37.88    | 66.3 68.61     |
| CD27+CD28+CD45RA+CD16+/V $\delta$ 2+               |                    |                |                | n.a.           |                |                |                |
| CD27+CD28+CD45RA+CD16-/V $\delta$ 2+               | p-value            | 0.9871         | 0.2988         | 0.2801         | 0.824          | 0.8249         | 0.2921         |
|                                                    | median frequencies | 12.83 12.43    | 8.43 11.96     | 12.83 8.43     | 12.43 11.96    | 12.83 11.96    | 12.43 8.43     |
| CD27+CD28+CD45RA-CD16+/V $\delta$ 2+               |                    |                |                | n.a.           |                |                |                |
| CD27+CD28+CD45RA-CD16-/V $\delta$ 2+               | p-value            | 0.0493         | 0.1733         | 0.5912         | 0.2567         | 0.0004         | 0.5261         |
|                                                    | median frequencies | 22.71 30.07    | 25.76 36.10    | 22.71 25.76    | 30.07 36.10    | 22.71 36.10    | 30.07 25.76    |
| CD27+CD28-CD45RA+CD16+/V $\delta$ 2+               | p-value            | 0.0207         | 0.5185         | 0.0054         | 0.204          | 0.0015         | 0.087          |
|                                                    | median frequencies | 0.11 0.05      | 0.01 0.04      | 0.11 0.01      | 0.05 0.04      | 0.11 0.04      | 0.05 0.01      |
| CD27+CD28-CD45RA+CD16-/V $\delta$ 2+               | p-value            | < 0.0001       | 0.0903         | 0.0022         | 0.0603         | < 0.0001       | 0.7623         |
|                                                    | median frequencies | 28.17 17.46    | 17.49 12.59    | 28.17 17.49    | 17.46 12.59    | 28.17 12.59    | 17.46 17.49    |
| CD27+CD28-CD45RA-CD16+/V $\delta$ 2+               |                    |                |                | n.a.           |                |                |                |
| CD27+CD28-CD45RA-CD16-/V $\delta$ 2+               | p-value            | 0.2856         | 0.1739         | 0.0742         | 0.0194         | 0.2977         | 0.0243         |
|                                                    | median frequencies | 5.43 4.20      | 7.88 6.03      | 5.43 7.88      | 4.20 6.03      | 5.43 6.03      | 4.20 7.88      |
| CD27-CD28+CD45RA+CD16+/V $\delta$ 2+               |                    |                |                | n.a.           |                |                |                |
| CD27-CD28+CD45RA+CD16-/V $\delta$ 2+               | p-value            | 0.1272         | 0.369          | 0.2187         | 0.3279         | 0.8108         | 0.9489         |
|                                                    | median frequencies | 1.27 1.56      | 1.55 1.18      | 1.27 1.55      | 1.56 1.18      | 1.27 1.18      | 1.56 1.55      |
| CD27-CD28+CD45RA-CD16+/V $\delta$ 2+               |                    |                |                | n.a.           |                |                |                |
| CD27-CD28+CD45RA-CD16-/V $\delta$ 2+               | p-value            | 0.0005         | 0.4009         | 0.3303         | 0.9271         | 0.0087         | 0.446          |
|                                                    | median frequencies | 2.76 4.64      | 4.48 5.49      | 2.76 4.48      | 4.64 5.49      | 2.76 5.49      | 4.64 4.48      |
| CD27-CD28-CD45RA+CD16+/V $\delta$ 2+               | p-value            | 0.6109         | 0.3201         | 0.4664         | 0.4664         | 0.7125         | 0.3198         |
|                                                    | median frequencies | 0.14 0.18      | 0.08 0.15      | 0.14 0.08      | 0.18 0.15      | 0.14 0.15      | 0.18 0.08      |
| CD27-CD28-CD45RA+CD16-/V $\delta$ 2+               | p-value            | 0.9834         | 0.7768         | 0.7749         | 0.6014         | 0.327          | 0.8777         |
|                                                    | median frequencies | 15.60 14.95    | 11.47 10.76    | 15.60 11.47    | 14.95 10.76    | 15.60 10.76    | 14.95 11.47    |
| CD27-CD28-CD45RA-CD16+/V $\delta$ 2+               |                    |                |                | n.a.           |                |                |                |
| CD27-CD28-CD45RA-CD16-/V $\delta$ 2+               | p-value            | 0.7188         | 0.6153         | 0.0392         | 0.0392         | 0.0447         | 0.0601         |
|                                                    | median frequencies | 2.62 2.68      | 3.71 4.27      | 2.62 3.71      | 2.68 4.27      | 2.62 4.27      | 2.68 3.71      |
| V $\delta$ 1+/ $\gamma\delta$ T-cells              |                    |                |                |                |                |                |                |
| CD27+CD28+CD45RA+CD16+/V $\delta$ 1+               | p-value            | 0.8003         | 0.1125         | 0.1487         | < 0.0001       | < 0.0001       | 0.1822         |
|                                                    | median frequencies | 12.32 11.46    | 11.31 32.93    | 12.32 32.93    | 11.46 32.93    | 12.32 32.93    | 11.46 11.31    |
| CD27+CD28+CD45RA+CD16-/V $\delta$ 1+               | p-value            | 0.1619         | 0.5522         | 0.4549         | 0.2453         | 0.8474         | 0.8696         |
|                                                    | median frequencies | 0.03 0.05      | 0.07 0.02      | 0.03 0.07      | 0.05 0.02      | 0.03 0.02      | 0.05 0.07      |
| CD27+CD28+CD45RA-CD16+/V $\delta$ 1+               | p-value            | < 0.0001       | 0.0391         | 0.0122         | 0.0045         | < 0.0001       | 0.842          |
|                                                    | median frequencies | 29.14 17.70    | 16.35 6.33     | 29.14 16.35    | 17.70 6.33     | 29.14 6.33     | 17.70 16.35    |
| CD27+CD28+CD45RA-CD16-/V $\delta$ 1+               |                    |                |                | n.a.           |                |                |                |
| CD27+CD28+CD45RA-CD16+/V $\delta$ 1+               | p-value            | 0.9352         | 0.6664         | 0.0797         | 0.0102         | 0.0015         | 0.1424         |
|                                                    | median frequencies | 5.11 5.89      | 4.22 2.15      | 5.11 4.22      | 5.89 2.15      | 5.11 2.15      | 5.89 4.22      |
| CD27+CD28+CD45RA+CD16+/V $\delta$ 1+               | p-value            | 0.3458         | 0.5323         | 0.4977         | 0.4287         | 0.7999         | 0.9314         |
|                                                    | median frequencies | 0.06 0.03      | 0.04 0.05      | 0.06 0.04      | 0.03 0.05      | 0.06 0.05      | 0.03 0.04      |
| CD27+CD28-CD45RA+CD16+/V $\delta$ 1+               | p-value            | 0.1011         | 0.0288         | 0.0048         | < 0.0001       | < 0.0001       | 0.056          |
|                                                    | median frequencies | 37.81 32.81    | 24.26 17.77    | 37.81 17.77    | 32.81 17.77    | 37.81 17.77    | 32.81 17.77    |
| CD27+CD28-CD45RA-CD16+/V $\delta$ 1+               |                    |                |                | n.a.           |                |                |                |
| CD27+CD28-CD45RA-CD16-/V $\delta$ 1+               | p-value            | 0.056          | 0.0173         | 0.7954         | 0.0022         | < 0.0001       | 0.4411         |
|                                                    | median frequencies | 1.80 1.31      | 1.56 0.69      | 1.80 1.56      | 1.31 0.69      | 1.80 0.69      | 1.31 1.56      |
| CD27-CD28+CD45RA+CD16+/V $\delta$ 1+               |                    |                |                | n.a.           |                |                |                |
| CD27-CD28+CD45RA+CD16-/V $\delta$ 1+               |                    |                |                | n.a.           |                |                |                |
| CD27-CD28+CD45RA-CD16+/V $\delta$ 1+               |                    |                |                | n.a.           |                |                |                |
| CD27-CD28+CD45RA-CD16-/V $\delta$ 1+               |                    |                |                | n.a.           |                |                |                |
| CD27-CD28-CD45RA+CD16+/V $\delta$ 1+               | p-value            | 0.0159         | 0.6875         | 0.2981         | 0.871          | 0.0174         | 0.7255         |
|                                                    | median frequencies | 0.34 0.65      | 0.46 0.74      | 0.34 0.46      | 0.65 0.74      | 0.34 0.74      | 0.65 0.46      |
| CD27-CD28-CD45RA+CD16-/V $\delta$ 1+               | p-value            | < 0.0001       | 0.0275         | 0.0018         | < 0.0001       | < 0.0001       | 0.3885         |
|                                                    | median frequencies | 18.65 37.02    | 46.87 65.15    | 18.65 46.87    | 37.02 65.15    | 18.65 65.15    | 37.01 46.87    |
| CD27-CD28-CD45RA-CD16+/V $\delta$ 1+               | p-value            | 0.4103         | 0.6057         | 0.6705         | 0.6242         | 0.2102         | 0.8439         |
|                                                    | median frequencies | 0.06 0.02      | 0.03 0.01      | 0.06 0.03      | 0.02 0.01      | 0.06 0.01      | 0.01 0.03      |
| CD27-CD28-CD45RA-CD16-/V $\delta$ 1+               | p-value            | 0.8439         | 0.992          | 0.5574         | 0.5574         | 0.6291         | 0.5604         |
|                                                    | median frequencies | 0.93 1.38      | 1.44 0.97      | 0.93 1.44      | 1.38 0.97      | 0.93 0.97      | 1.38 1.44      |
| V $\delta$ 1-V $\delta$ 2-/ $\gamma\delta$ T-cells |                    |                |                |                |                |                |                |
| CD27+CD28+CD45RA+CD16+/V $\delta$ 1-V $\delta$ 2-  | p-value            | 0.1563         | 0.555          | 0.3605         | 0.3028         | 0.063          | 0.9269         |
|                                                    | median frequencies | 14.94 18.35    | 17.17 18.91    | 14.94 17.17    | 18.35 18.91    | 14.94 18.91    | 18.35 17.17    |
| CD27+CD28+CD45RA+CD16-/V $\delta$ 1-V $\delta$ 2-  | p-value            | 0.2828         | 0.0145         | 0.1457         | 0.3771         | 0.0359         | 0.0855         |
|                                                    | median frequencies | 0.04 0.0       | 0.14 0.0       | 0.04 0.14      | 0.0 0.0        | 0.04 0.0       | 0.0 0.14       |
| CD27+CD28+CD45RA+CD16-/V $\delta$ 1-V $\delta$ 2-  | p-value            | < 0.0001       | 0.0462         | 0.2247         | 0.1554         | < 0.0001       | 0.1136         |
|                                                    | median frequencies | 29.26 18.57    | 23.75 14.31    | 29.26 23.75    | 18.57 14.31    | 29.26 14.31    | 18.57 23.75    |
| CD27+CD28+CD45RA-CD16+/V $\delta$ 1-V $\delta$ 2-  |                    |                |                | n.a.           |                |                |                |
| CD27+CD28+CD45RA-CD16-/V $\delta$ 1-V $\delta$ 2-  | p-value            | 0.6112         | 0.457          | 0.4246         | 0.0286         | 0.0071         | 0.6269         |
|                                                    | median frequencies | 6.10 5.14      | 5.42 4.10      | 6.10 5.42      | 5.14 4.10      | 6.10 4.10      | 5.14 5.42      |
| CD27+CD28-CD45RA+CD16+/V $\delta$ 1-V $\delta$ 2-  | p-value            | 0.1661         | > 0.9999       | 0.5596         | 0.0206         | 0.1876         | 0.0979         |
|                                                    | median frequencies | 0.06 0.10      | 0.07 0.06      | 0.06 0.07      | 0.10 0.06      | 0.06 0.06      | 0.10 0.07      |
| CD27+CD28-CD45RA+CD16-/V $\delta$ 1-V $\delta$ 2-  | p-value            | 0.0057         | 0.9272         | 0.0138         | 0.2279         | 0.0005         | 0.4824         |
|                                                    | median frequencies | 24.63 19.59    | 19.00 16.26    | 24.63 19.00    | 19.59 16.26    | 24.63 16.26    | 19.59 19.00    |
| CD27+CD28-CD45RA-CD16+/V $\delta$ 1-V $\delta$ 2-  |                    |                |                | n.a.           |                |                |                |
| CD27+CD28-CD45RA-CD16-/V $\delta$ 1-V $\delta$ 2-  | p-value            | 0.0346         | 0.0064         | 0.8951         | 0.0836         | < 0.0001       | 0.3055         |
|                                                    | median frequencies | 1.42 0.75      | 1.50 0.55      | 1.42 1.50      | 0.75 0.55      | 1.42 0.55      | 0.75 1.50      |
| CD27-CD28+CD45RA+CD16+/V $\delta$ 1-V $\delta$ 2-  |                    |                |                | n.a.           |                |                |                |
| CD27-CD28+CD45RA+CD16-/V $\delta$ 1-V $\delta$ 2-  |                    |                |                | n.a.           |                |                |                |
| CD27-CD28+CD45RA-CD16+/V $\delta$ 1-V $\delta$ 2-  |                    |                |                | n.a.           |                |                |                |
| CD27-CD28+CD45RA-CD16-/V $\delta$ 1-V $\delta$ 2-  |                    |                |                | n.a.           |                |                |                |
| CD27-CD28-CD45RA+CD16+/V $\delta$ 1-V $\delta$ 2-  | p-value            | 0.0006         | 0.1434         | 0.3897         | 0.8437         | 0.0009         | 0.2041         |
|                                                    | median frequencies | 0.50 1.15      | 0.81 1.24      | 0.50 0.81      | 1.15 1.24      | 0.50 1.24      | 1.15 0.81      |
| CD27-CD28-CD45RA+CD16-/V $\delta$ 1-V $\delta$ 2-  | p-value            | < 0.0001       | 0.0592         | 0.0144         | 0.0178         | < 0.0001       | 0.5097         |
|                                                    | median frequencies | 25.57 39.93    | 37.14 48.13    | 25.57 37.14    | 39.93 48.13    | 25.57 48.13    | 39.93 37.14    |
| CD27-CD28-CD45RA-CD16+/V $\delta$ 1-V $\delta$ 2-  | p-value            | 0.5173         | 0.8257         | 0.943          | 0.3585         | 0.7384         | 0.7417         |
|                                                    | median frequencies | 0.04 0.04      | 0.05 0.0       | 0.04 0.05      | 0.04 0.0       | 0.04 0.0       | 0.04 0.05      |
| CD27-CD28-CD45RA-CD16-/V $\delta$ 1-V $\delta$ 2-  | p-value            | 0.0002         | 0.6561         | 0.3494         | 0.8755         | 0.0006         | 0.489          |
|                                                    | median frequencies | 2.35 4.34      | 3.88 4.28      | 2.35 3.88      | 4.34 4.28      | 2.35 4.28      | 4.34 3.88      |
| V $\delta$ 1+/V $\delta$ 2+                        |                    |                |                |                |                |                |                |
| V $\delta$ 1+/V $\delta$ 2+                        | p-value            | 0.5722         | 0.0634         | 0.1754         | < 0.0001       | < 0.0001       | 0.334          |
|                                                    | median             | 0.19 0.17      | 0.20 0.83      | 0.19 0.20      | 0.17 0.83      | 0.19 0.83      | 0.17 0.20      |

Bonferroni correction: p-values  $\leq 0.0083$  were considered significant

**Table S2: Results of Mann-Whitney comparisons of the CD8+  $\gamma\delta$  T-cell compartments and subsets.**

p-values and median frequencies are displayed for young CMV-seropositive (yCMV+), young CMV-seronegative (yCMV-), old CMV-seropositive (oCMV+) and old CMV-seronegative (oCMV-).

| phenotype                                          |                    | oCMV+ vs oCMV- |      | yCMV+ vs yCMV- |      | oCMV+ vs yCMV+ |      | oCMV- vs yCMV-  |      | oCMV+ vs yCMV-  |      | oCMV- vs yCMV+ |      |
|----------------------------------------------------|--------------------|----------------|------|----------------|------|----------------|------|-----------------|------|-----------------|------|----------------|------|
| CD8+/ $\gamma\delta$ T-cells                       | p-value            | <b>0.0008</b>  |      | 0.3605         |      | 0.1672         |      | 0.5323          |      | <b>0.0002</b>   |      | 0.6131         |      |
|                                                    | median frequencies | 10             | 5.2  | 7.1            | 4.9  | 10             | 7.1  | 5.2             | 4.9  | 10              | 4.9  | 5.2            | 7.1  |
| V $\delta$ 2+/ $\gamma\delta$ T-cells              | p-value            | <b>0.0026</b>  |      | 0.0676         |      | 0.9293         |      | 0.2563          |      | 0.01            |      | 0.0295         |      |
|                                                    | median frequencies | 1.5            | 6.9  | 2.5            | 4.6  | 1.5            | 2.5  | 6.9             | 4.6  | 1.5             | 4.6  | 6.9            | 2.5  |
| CD27-CD28-/V $\delta$ 2+                           |                    |                |      |                |      |                |      |                 |      |                 |      | n.a.           |      |
| CD27-CD28+/V $\delta$ 2+                           |                    |                |      |                |      |                |      |                 |      |                 |      | n.a.           |      |
| CD27+CD28-/V $\delta$ 2+                           |                    |                |      |                |      |                |      |                 |      |                 |      | n.a.           |      |
| CD27+CD28+/V $\delta$ 2+                           |                    |                |      |                |      |                |      |                 |      |                 |      | n.a.           |      |
| V $\delta$ 1+/ $\gamma\delta$ T-cells              | p-value            | <b>0.0062</b>  |      | 0.2062         |      | 0.1221         |      | 0.0245          |      | < <b>0.0001</b> |      | 0.9023         |      |
|                                                    | median frequencies | 65.5           | 55.6 | 54.6           | 47.5 | 65.5           | 54.6 | 55.6            | 47.5 | 65.5            | 47.5 | 55.6           | 54.6 |
| CD27-CD28-/V $\delta$ 1+                           | p-value            | <b>0.0002</b>  |      | <b>0.0029</b>  |      | 0.2143         |      | 0.0217          |      | < <b>0.0001</b> |      | 0.2519         |      |
|                                                    | median frequencies | 73.0           | 60.0 | 63.5           | 47.9 | 73.0           | 63.5 | 60.0            | 47.9 | 73.0            | 47.9 | 60.0           | 63.5 |
| CD27-CD28+/V $\delta$ 1+                           | p-value            | 0.6671         |      | 0.7437         |      | 0.8928         |      | 0.8323          |      | 0.7417          |      | 0.5812         |      |
|                                                    | median frequencies | 1.5            | 1.6  | 1.6            | 1.6  | 1.5            | 1.6  | 1.6             | 1.6  | 1.5             | 1.6  | 1.6            | 1.6  |
| CD27+CD28-/V $\delta$ 1+                           | p-value            | 0.0162         |      | 0.0324         |      | 0.327          |      | <b>0.0058</b>   |      | < <b>0.0001</b> |      | 0.5319         |      |
|                                                    | median frequencies | 15.4           | 24.8 | 17.8           | 32.6 | 15.4           | 17.8 | 24.8            | 32.6 | 15.4            | 32.6 | 24.8           | 17.8 |
| CD27+CD28+/V $\delta$ 1+                           | p-value            | <b>0.0002</b>  |      | 0.014          |      | 0.2136         |      | <b>0.001</b>    |      | < <b>0.0001</b> |      | 0.4634         |      |
|                                                    | median frequencies | 3.0            | 5.7  | 5.3            | 9.3  | 3.0            | 5.3  | 5.7             | 9.3  | 3.0             | 9.3  | 5.7            | 5.3  |
| V $\delta$ 1-V $\delta$ 2-/ $\gamma\delta$ T-cells | p-value            | 0.7348         |      | 0.5247         |      | 0.0453         |      | <b>0.0002</b>   |      | <b>0.0005</b>   |      | 0.0358         |      |
|                                                    | median frequencies | 22.4           | 23.5 | 32.6           | 36.0 | 22.4           | 32.6 | 23.5            | 36.0 | 22.4            | 36.0 | 23.5           | 32.6 |
| CD27-CD28-/V $\delta$ 1-V $\delta$ 2-              | p-value            | 0.0357         |      | <b>0.006</b>   |      | 0.0328         |      | < <b>0.0001</b> |      | < <b>0.0001</b> |      | 0.7036         |      |
|                                                    | median frequencies | 53.2           | 29.3 | 17.5           | 7.5  | 53.2           | 17.5 | 29.3            | 7.5  | 53.2            | 7.5  | 29.3           | 17.5 |
| CD27-CD28+/V $\delta$ 1-V $\delta$ 2-              | p-value            | 0.2367         |      | 0.0567         |      | 0.5949         |      | < <b>0.0001</b> |      | <b>0.0027</b>   |      | 0.1376         |      |
|                                                    | median frequencies | 1.3            | 1.6  | 1.0            | 0.7  | 1.3            | 1.0  | 1.6             | 1.0  | 1.3             | 0.7  | 1.6            | 1.0  |
| CD27+CD28-/V $\delta$ 1-V $\delta$ 2-              | p-value            | 0.0513         |      | 0.6587         |      | 0.4447         |      | 0.1732          |      | 0.2582          |      | 0.6149         |      |
|                                                    | median frequencies | 8.5            | 12.6 | 13.7           | 9.7  | 8.5            | 13.7 | 12.6            | 9.7  | 8.5             | 9.7  | 12.6           | 13.7 |
| CD27+CD28+/V $\delta$ 1-V $\delta$ 2-              | p-value            | 0.1561         |      | 0.0744         |      | <b>0.001</b>   |      | < <b>0.0001</b> |      | < <b>0.0001</b> |      | 0.0222         |      |
|                                                    | median frequencies | 21.6           | 37.6 | 57.4           | 70.0 | 21.6           | 57.4 | 37.6            | 70.0 | 21.6            | 70.0 | 37.6           | 57.4 |

Bonferroni correction: p-values  $\leq 0.0083$  were considered significant

**Table S3: Results of Mann-Whitney comparisons of the  $\alpha\beta$ T-cell compartments and subsets.**

$\alpha\beta$  T-cells are identified as CD3+  $\gamma\delta$  TCR-. p-values and median frequencies are displayed for young CMV-seropositive (yCMV+), young CMV-seronegative (yCMV-), old CMV-seropositive (oCMV+) and old CMV-seronegative (oCMV-).

| phenotype                   |                    | yCMV- vs oCMV- | yCMV+ vs oCMV+ | yCMV- vs yCMV+ | oCMV- vs oCMV+ | yCMV- vs oCMV+ | oCMV- vs yCMV+ |
|-----------------------------|--------------------|----------------|----------------|----------------|----------------|----------------|----------------|
| y $\delta$ TCR-/CD3+        | p-value            | < 0.0001       |                | 0.5357         | 0.1989         | 0.2706         | 0.0076         |
|                             | median frequencies | 95.6           | 97.4           | 96.9           | 97.1           | 95.6           | 97.1           |
| CD4+/y $\delta$ TCR-        | p-value            | < 0.0001       |                | 0.0260         | 0.4939         | < 0.0001       | 0.0002         |
|                             | median frequencies | 69.8           | 81.1           | 66.2           | 74.9           | 69.8           | 74.9           |
| CD27+CD28+CD45RA+CD16-/CD4+ | p-value            | < 0.0001       |                | 0.0120         | 0.0363         | 0.0034         | < 0.0001       |
|                             | median frequencies | 68.7           | 57.9           | 61.6           | 52.1           | 68.7           | 52.1           |
| CD27+CD28+CD45RA-CD16-/CD4+ | p-value            | < 0.0001       |                | 0.0243         | 0.2630         | 0.484          | < 0.0001       |
|                             | median frequencies | 28.2           | 38.2           | 32.2           | 39.2           | 28.2           | 39.2           |
| CD27+CD28-CD45RA+CD16-/CD4+ | p-value            | 0.1934         |                | 0.3510         | 0.0201         | < 0.0001       | < 0.0001       |
|                             | median frequencies | 0.3            | 0.4            | 0.6            | 1.0            | 0.3            | 0.6            |
| CD27+CD28-CD45RA-CD16-/CD4+ | p-value            | 0.0001         |                | 0.0173         | 0.0292         | < 0.0001       | < 0.0001       |
|                             | median frequencies | 0.07           | 0.13           | 0.13           | 0.25           | 0.07           | 0.13           |
| CD27-CD28+CD45RA+CD16-/CD4+ | p-value            | 0.5235         |                | 0.9740         | 0.5544         | 0.1150         | 0.3923         |
|                             | median frequencies | 0.10           | 0.10           | 0.13           | 0.12           | 0.10           | 0.13           |
| CD27-CD28+CD45RA-CD16-/CD4+ | p-value            | 0.0314         |                | 0.8988         | 0.0120         | 0.0143         | 0.0001         |
|                             | median frequencies | 2.57           | 2.83           | 3.7            | 3.98           | 2.57           | 3.98           |
| CD27-CD28-CD45RA-CD16-/CD4+ | p-value            | 0.0029         |                | 0.0053         | 0.0002         | < 0.0001       | < 0.0001       |
|                             | median frequencies | 0.04           | 0.06           | 0.22           | 1.12           | 0.04           | 1.12           |
| CD27-CD28-CD45RA+CD16-/CD4+ | p-value            | 0.0150         |                | 0.0290         | 0.0295         | < 0.0001       | < 0.0001       |
|                             | median frequencies | 0.02           | 0.05           | 0.11           | 0.56           | 0.02           | 0.56           |
| CD8+/y $\delta$ TCR-        | p-value            | < 0.0001       |                | 0.0583         | 0.7376         | < 0.0001       | 0.0003         |
|                             | median frequencies | 27.10          | 16.23          | 30.42          | 21.54          | 27.10          | 30.42          |
| CD27+CD28+CD45RA+CD16-/CD8+ | p-value            | < 0.0001       |                | 0.0001         | 0.0029         | 0.0005         | < 0.0001       |
|                             | median frequencies | 76.54          | 46.10          | 65.20          | 33.93          | 76.54          | 33.93          |
| CD27+CD28+CD45RA-CD16-/CD8+ | p-value            | < 0.0001       |                | 0.0057         | 0.8875         | 0.0009         | < 0.0001       |
|                             | median frequencies | 11.23          | 24.39          | 12.27          | 16.66          | 11.23          | 16.66          |
| CD27+CD28-CD45RA+CD16-/CD8+ | p-value            | 0.0031         |                | 0.3548         | 0.1087         | 0.0121         | 0.7876         |
|                             | median frequencies | 4.19           | 6.44           | 5.32           | 4.27           | 4.19           | 5.32           |
| CD27+CD28-CD45RA-CD16-/CD8+ | p-value            | 0.0352         |                | 0.4358         | 0.2286         | 0.0334         | 0.8229         |
|                             | median frequencies | 1.21           | 1.69           | 1.99           | 1.17           | 1.21           | 1.17           |
| CD27-CD28+CD45RA+CD16-/CD8+ | p-value            | < 0.0001       |                | 0.0035         | 0.1996         | 0.0243         | < 0.0001       |
|                             | median frequencies | 0.45           | 1.07           | 0.80           | 1.43           | 0.45           | 1.43           |
| CD27-CD28+CD45RA-CD16-/CD8+ | p-value            | < 0.0001       |                | 0.0033         | 0.3786         | 0.1564         | < 0.0001       |
|                             | median frequencies | 0.73           | 1.93           | 0.81           | 1.83           | 0.73           | 1.83           |
| CD27-CD28-CD45RA+CD16-/CD8+ | p-value            | < 0.0001       |                | 0.0113         | < 0.0001       | < 0.0001       | < 0.0001       |
|                             | median frequencies | 2.52           | 6.85           | 12.55          | 25.32          | 2.52           | 25.32          |
| CD27-CD28-CD45RA-CD16-/CD8+ | p-value            | 0.0204         |                | 0.7475         | 0.0018         | 0.0001         | < 0.0001       |
|                             | median frequencies | 0.55           | 0.96           | 3.01           | 2.05           | 0.55           | 2.05           |
| CD4/CD8                     | p-value            | < 0.0001       |                | 0.0497         | 0.6148         | < 0.0001       | 0.0003         |
|                             | median             | 2.59           | 5.01           | 2.21           | 3.43           | 2.59           | 3.43           |

Bonferroni correction: p-values  $\leq 0.0083$  were considered significant

**Table S4: Results of Mann-Whitney comparisons of the absolute counts for all T-cell compartments.**

p-values and median counts are displayed for young CMV-seropositive (yCMV+), young CMV-seronegative (yCMV-), old CMV-seropositive (oCMV+) and old CMV-seronegative (oCMV-).

| phenotype                          |               | yCMV- vs oCMV-     | yCMV+ vs oCMV+ | yCMV- vs yCMV+ | oCMV- vs oCMV+     | yCMV- vs oCMV+     | oCMV- vs yCMV+     |
|------------------------------------|---------------|--------------------|----------------|----------------|--------------------|--------------------|--------------------|
| Lymphocytes                        | p-value       | <b>0.0002</b>      | 0.9798         | 0.1230         | 0.1504             | 0.1045             | 0.3460             |
|                                    | median counts | 1815 1540          | 1700 1670      | 1815 1700      | 1540 1670          | 1815 1670          | 1540 1700          |
| T-cells                            | p-value       | <b>&lt; 0.0001</b> | 0.8504         | 0.1255         | 0.0585             | 0.0488             | 0.1247             |
|                                    | median counts | 1449 1119          | 1354 1323      | 1449 1354      | 1119 1323          | 1449 1323          | 1119 1354          |
| $\alpha\beta$ T-cells              | p-value       | <b>&lt; 0.0001</b> | 0.8504         | 0.1808         | 0.0708             | 0.0856             | 0.1617             |
|                                    | median counts | 1400 1099          | 1295 1276      | 1400 1295      | 1099 1276          | 1400 1276          | 1099 1295          |
| CD4+ T-cells                       | p-value       | 0.0708             | 0.4497         | 0.1803         | 0.6640             | 0.6227             | 0.6701             |
|                                    | median counts | 960 900            | 848 914        | 960 848        | 900 914            | 960 914            | 900 848            |
| CD8+ T-cells                       | p-value       | <b>&lt; 0.0001</b> | 0.0758         | 0.5311         | <b>&lt; 0.0001</b> | <b>0.0003</b>      | <b>&lt; 0.0001</b> |
|                                    | median counts | 378 171            | 246 299        | 378 246        | 171 299            | 378 299            | 171 246            |
| CD4/CD8                            | p-value       | <b>&lt; 0.0001</b> | 0.0497         | 0.6859         | <b>&lt; 0.0001</b> | <b>0.0002</b>      | <b>&lt; 0.0001</b> |
|                                    | median        | 2.58 5.07          | 2.21 3.43      | 2.58 2.21      | 5.07 3.43          | 2.58 3.43          | 5.07 2.21          |
| $\gamma\delta$ T-cells/CD3+        | p-value       | <b>&lt; 0.0001</b> | 0.4063         | 0.1034         | 0.1185             | <b>0.0006</b>      | 0.0687             |
|                                    | median counts | 51 25              | 40 30          | 51 40          | 25 30              | 51 30              | 25 40              |
| V $\delta$ 2+ T-cells              | p-value       | <b>&lt; 0.0001</b> | 0.0742         | 0.0267         | 0.0623             | <b>&lt; 0.0001</b> | 0.4821             |
|                                    | median counts | 37 14              | 24 10          | 37 24          | 14 10              | 37 10              | 14 24              |
| V $\delta$ 1+ T-cells              | p-value       | <b>&lt; 0.0001</b> | 0.6345         | 0.8939         | <b>&lt; 0.0001</b> | 0.1349             | <b>0.0049</b>      |
|                                    | median counts | 6 2                | 5 8            | 6 5            | 2 8                | 6 8                | 2 5                |
| V $\delta$ 1-V $\delta$ 2- T-cells | p-value       | <b>&lt; 0.0001</b> | 0.5672         | 0.2588         | <b>0.0051</b>      | 0.0181             | 0.0197             |
|                                    | median counts | 7 4                | 6 5            | 7 6            | 4 5                | 7 5                | 4 6                |
| V $\delta$ 1+/V $\delta$ 2+        | p-value       | 0.6293             | 0.0641         | 0.1496         | <b>&lt; 0.0001</b> | <b>&lt; 0.0001</b> | 0.2794             |
|                                    | median        | 0.18 0.17          | 0.20 0.83      | 0.18 0.20      | 0.17 0.83          | 0.18 0.83          | 0.17 0.20          |

Bonferroni correction: p-values  $\leq 0.0083$  were considered significant

Figure S1

relative frequencies  $\gamma\delta$  T-cells

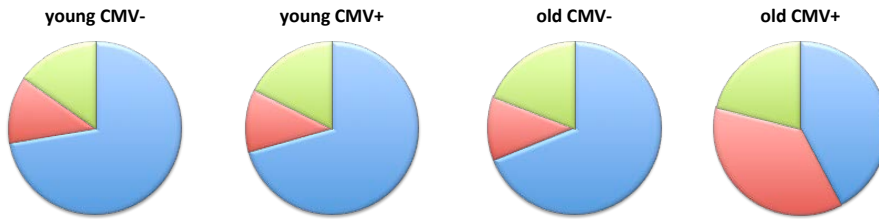

absolute counts  $\gamma\delta$  T-cells

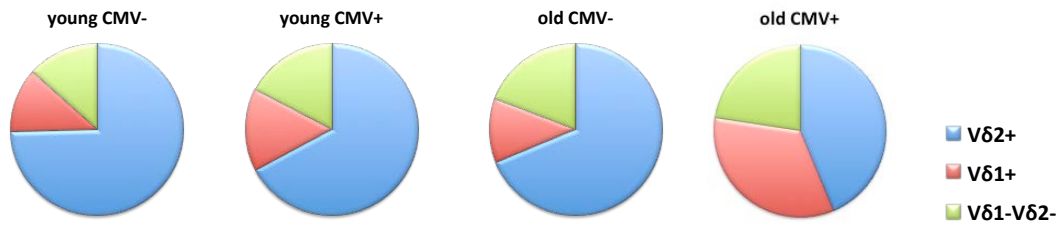

Figure S1: Median frequencies and absolute counts of the  $\gamma\delta$  T-cell compartments in young and old CMV-seropositive (CMV+) and seronegative (CMV-) individuals.

Figure S2

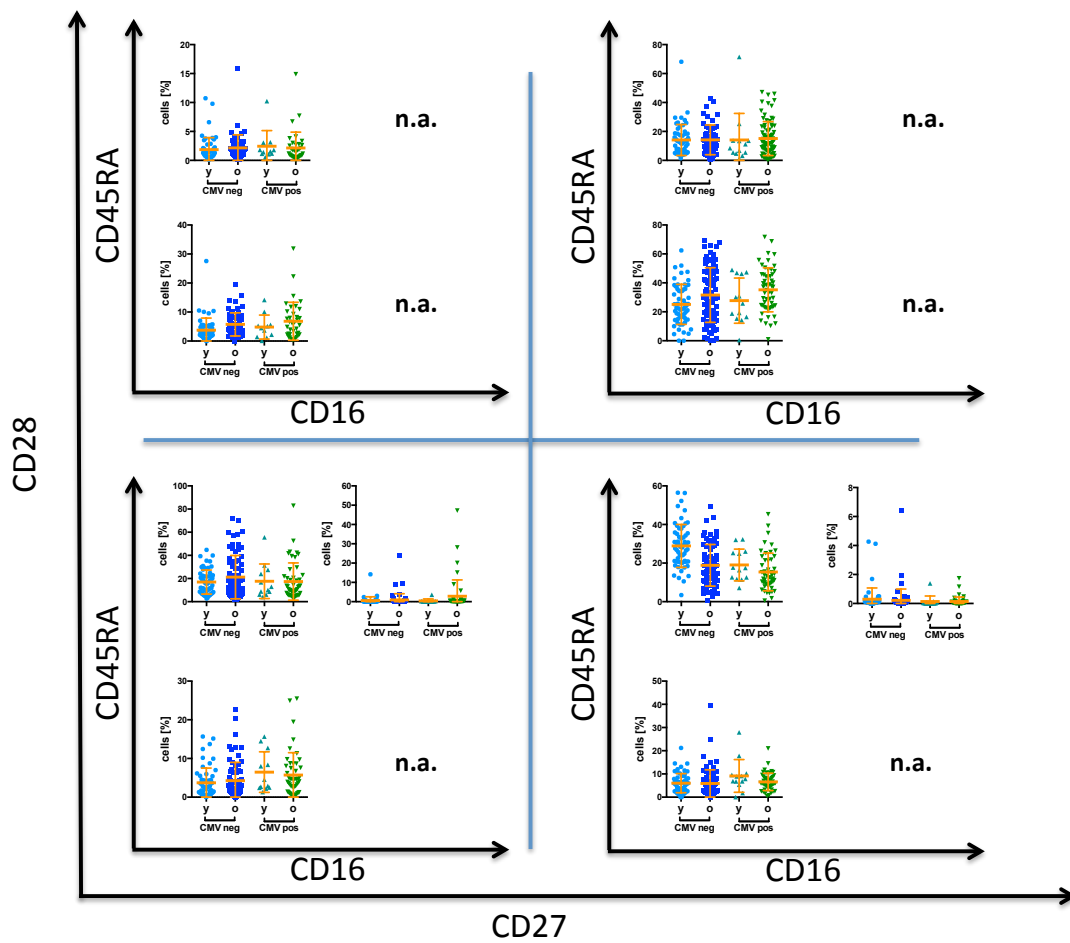

Figure S2: Differentiation phenotypes of the Vδ2+ compartment

The differentiation statuses were identified by CD27, CD28, CD45RA and CD16 in young (y) and old (o) CMV seropositive (CMV pos) and seronegative (CMV neg) individuals.

Figure S3

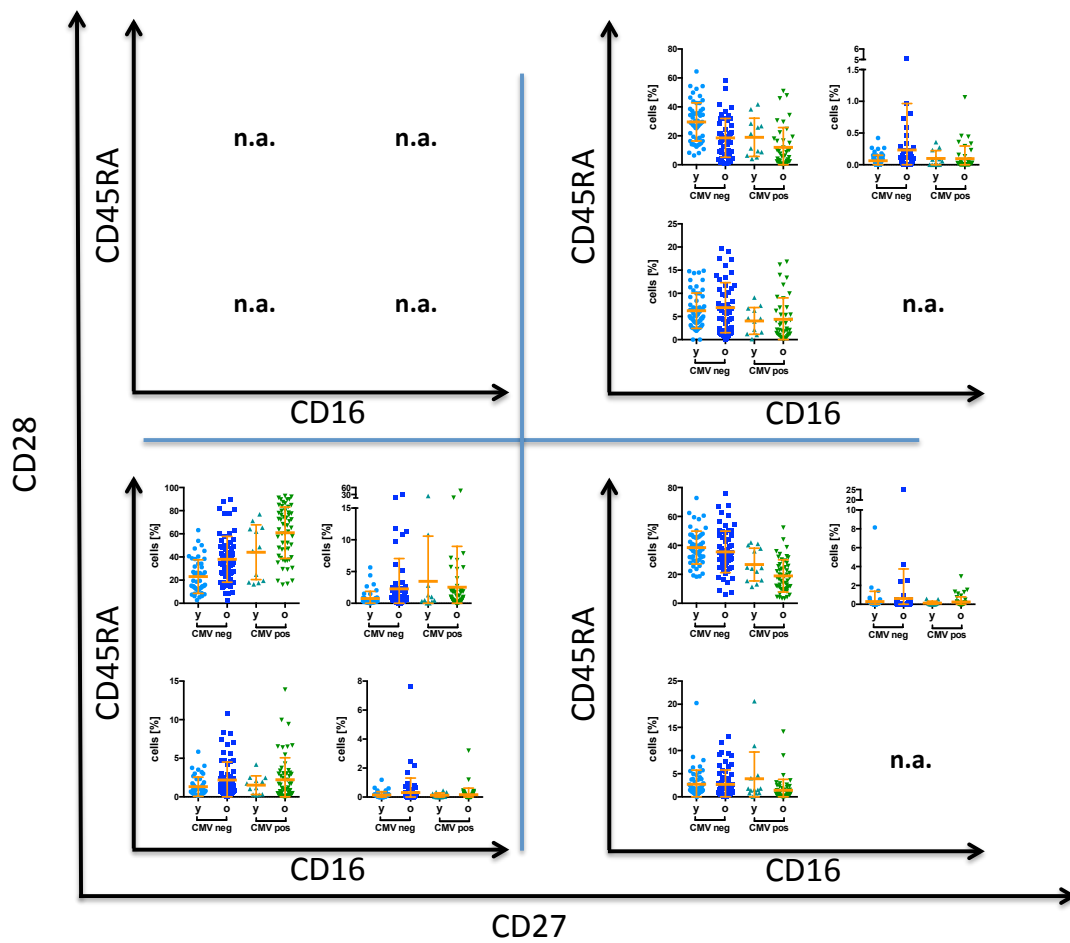

**Figure S3: Differentiation phenotypes of the Vδ1+ compartment**

The differentiation statuses were identified by CD27, CD28, CD45RA and CD16 in young (y) and old (o) CMV seropositive (CMV pos) and seronegative (CMV neg) individuals.



**Figure S4**

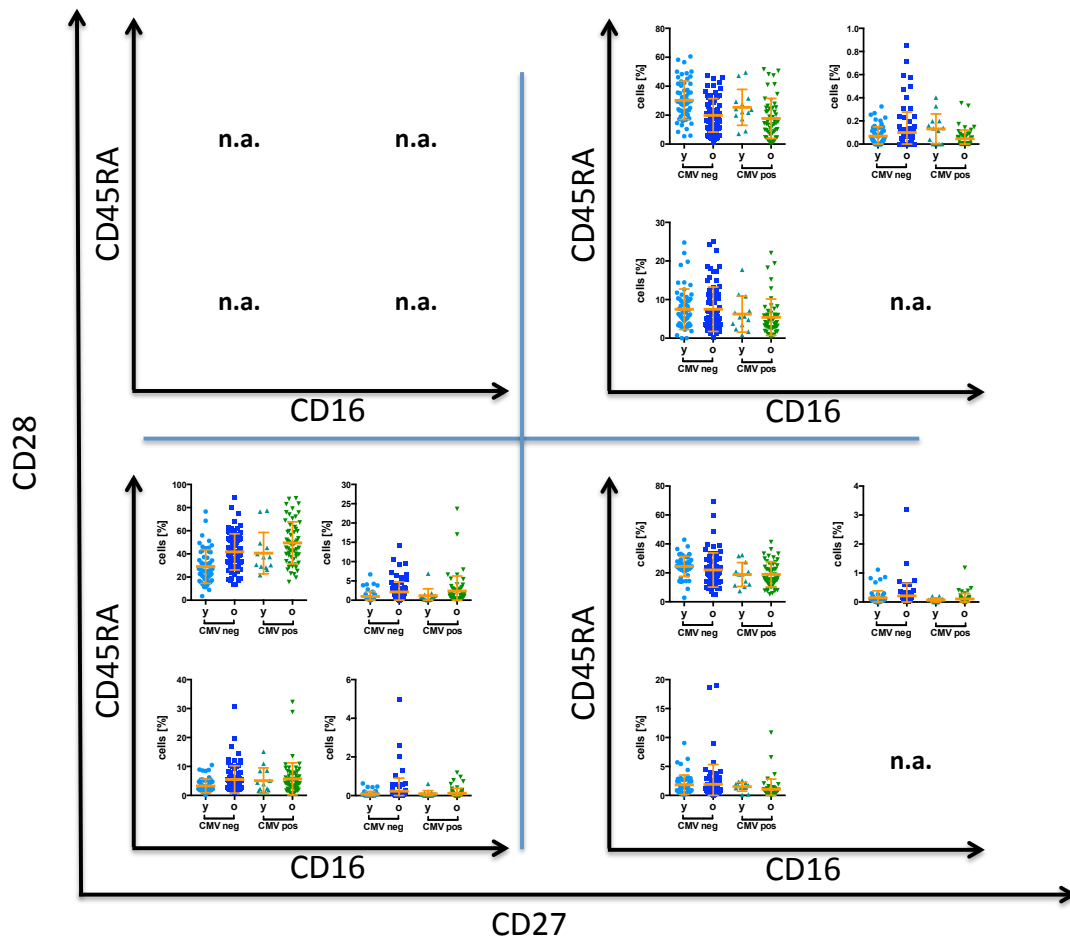

**Figure S4: Differentiation phenotypes of the Vδ1-Vδ2- compartment**

The differentiation statuses were identified by CD27, CD28, CD45RA and CD16 in young (y) and old (o) CMV seropositive (CMV pos) and seronegative (CMV neg) individuals.

Figure S5

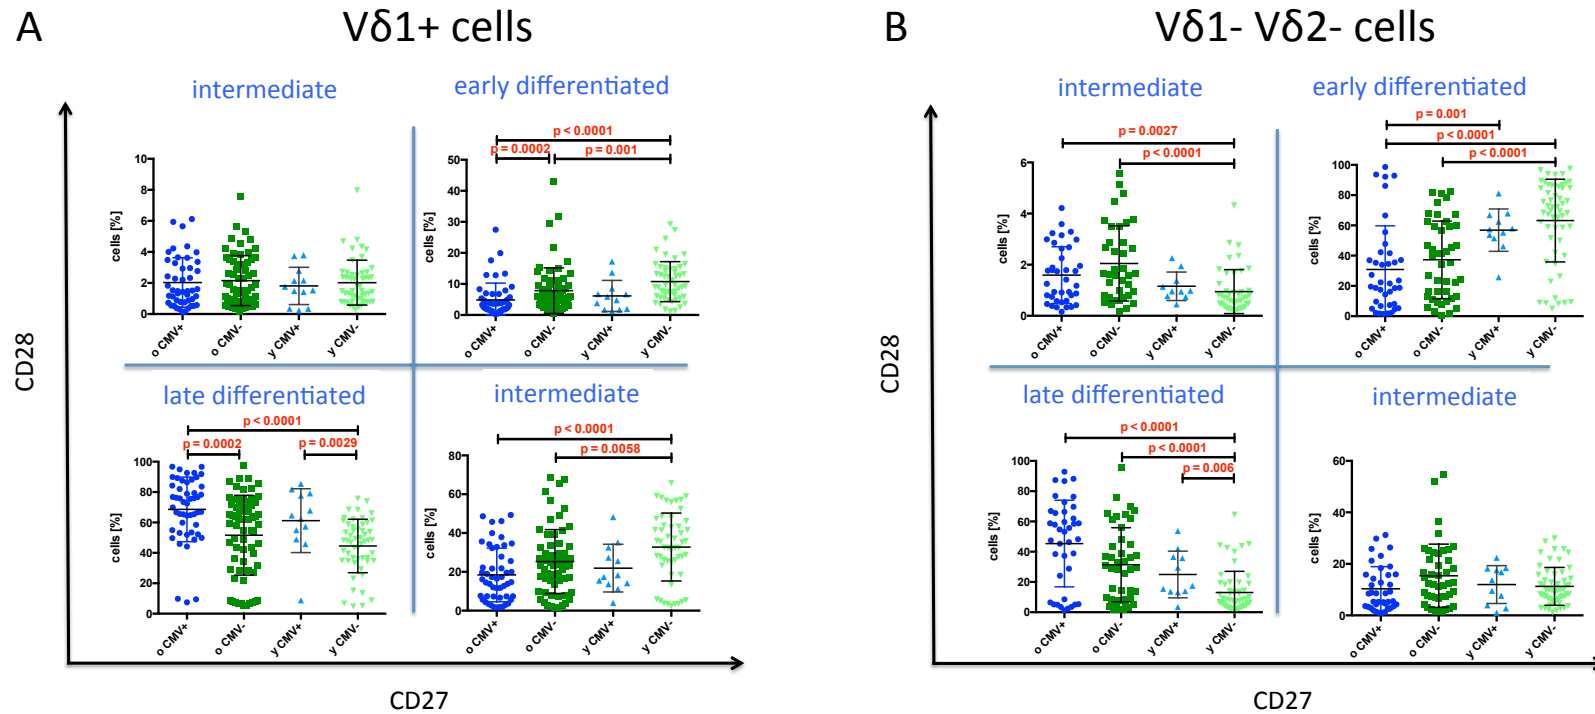

**Figure S5: Differentiation phenotypes of the CD8+  $\gamma\delta$  T-cells**

The differentiation statuses of the **A** V $\delta$ 1+ and **B** V $\delta$ 1-V $\delta$ 2- compartment were identified by CD27 and CD28 in young (y) and old (o) CMV seropositive (CMV+) and seronegative (CMV-) individuals.

Mann Whitney U test was used for the statistical comparison of groups. Bonferroni correction adjusted  $p \leq 0.0083$  as the level of significance.

Figure S6

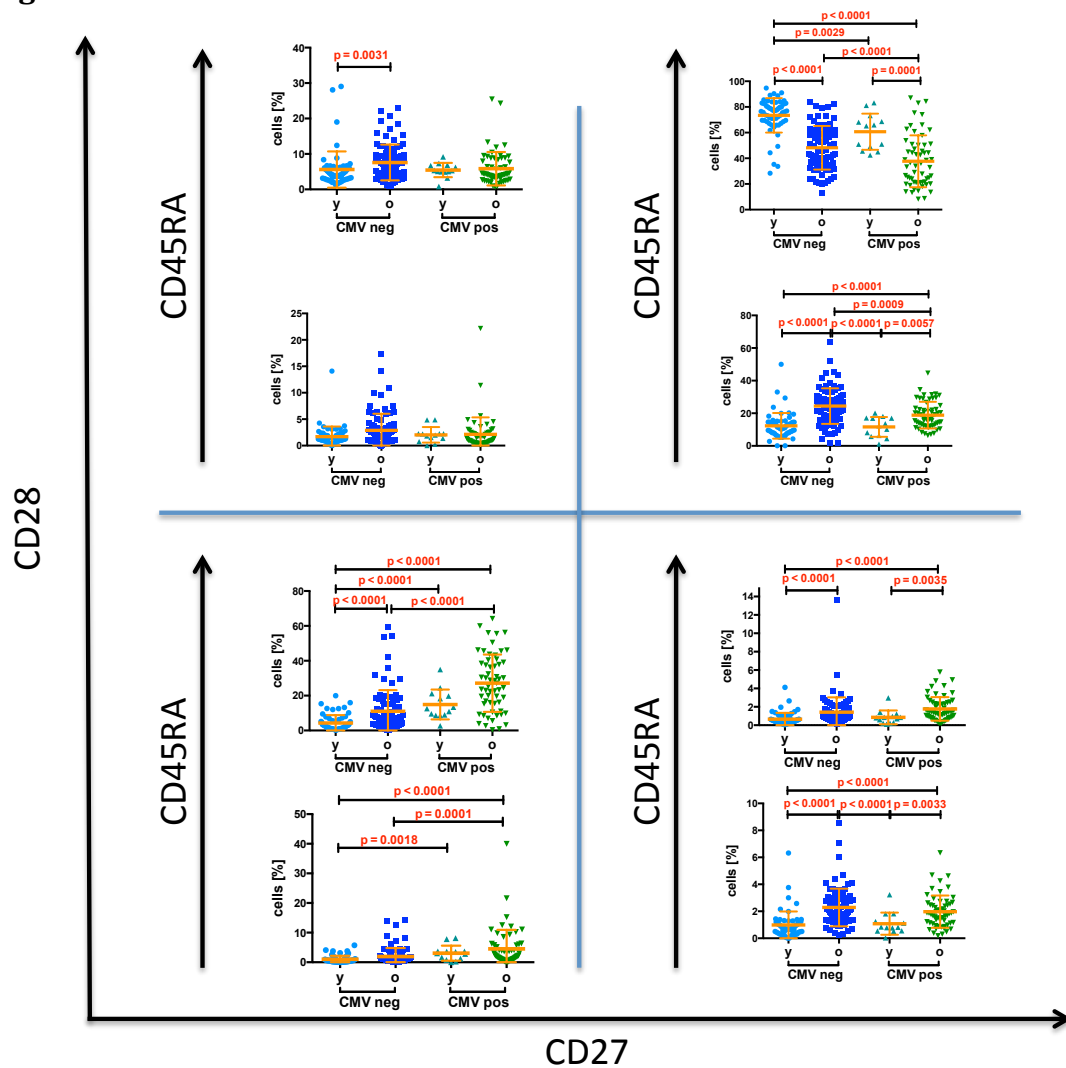

**Figure S6: Differentiation phenotypes of the CD8+  $\alpha\beta$  T-cells**

The differentiation compartments were identified by CD27, CD28, CD45RA and were all CD16 negative in young (y) and old (o) CMV seropositive (CMV pos) and seronegative (CMV neg) individuals.

Mann Whitney U test was used for the statistical comparison of groups.

Bonferroni correction adjusted  $p \leq 0.0083$  as the level of significance.

Figure S7

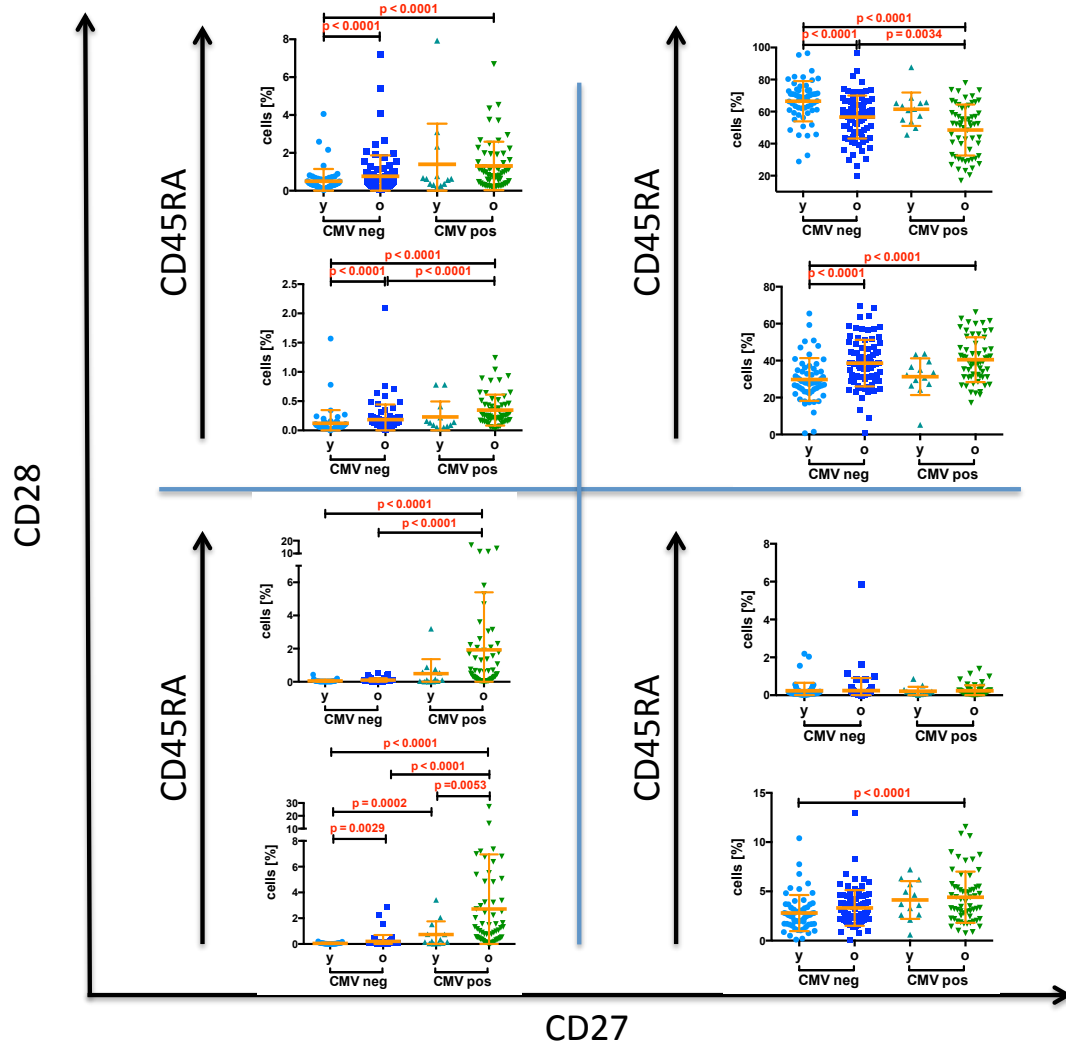

**Figure S7: Differentiation phenotypes of the CD4+ αβ T-cells**

The differentiation compartments were identified by CD27, CD28, CD45RA and were all CD16 negative in young (y) and old (o) CMV seropositive (CMV pos) and seronegative (CMV neg) individuals.

Mann Whitney U test was used for the statistical comparison of groups. Bonferroni correction adjusted  $p \leq 0.0083$  as the level of significance.

Figure S8: Gating strategy

Gating strategy – part 1

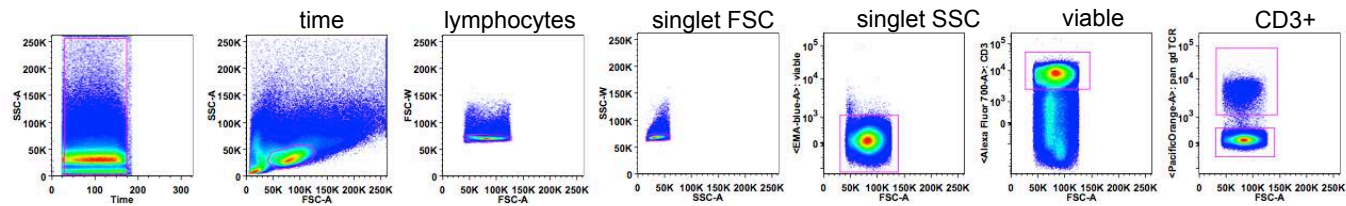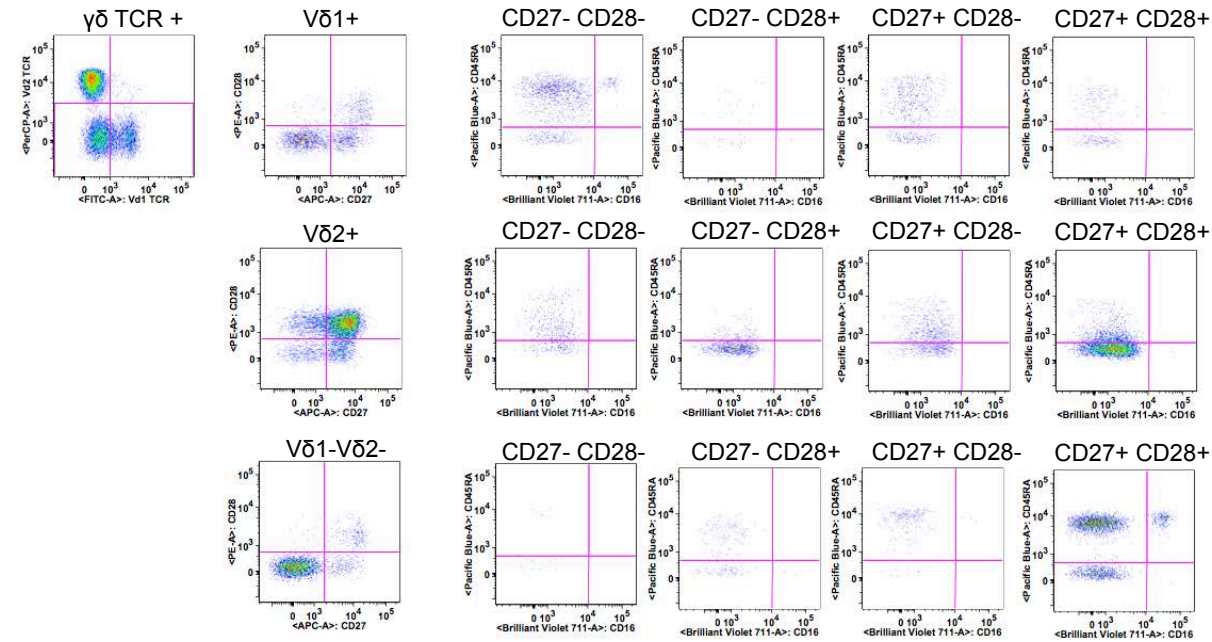

## Gating strategy – part 2

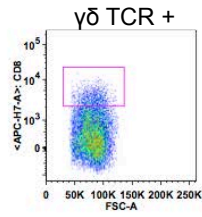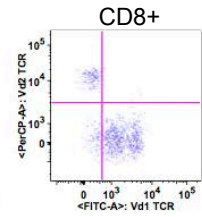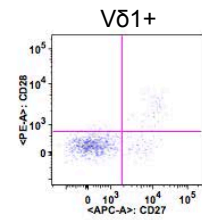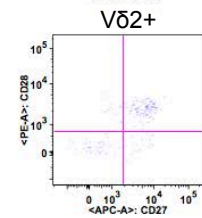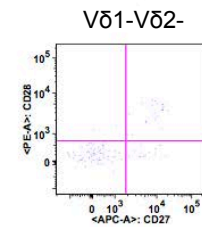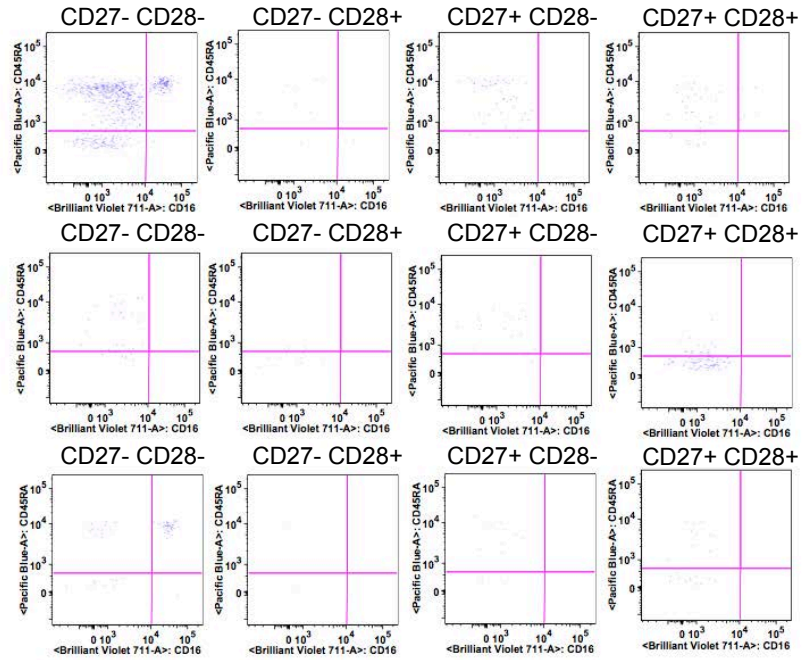

# Gating strategy – part 3

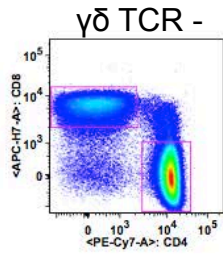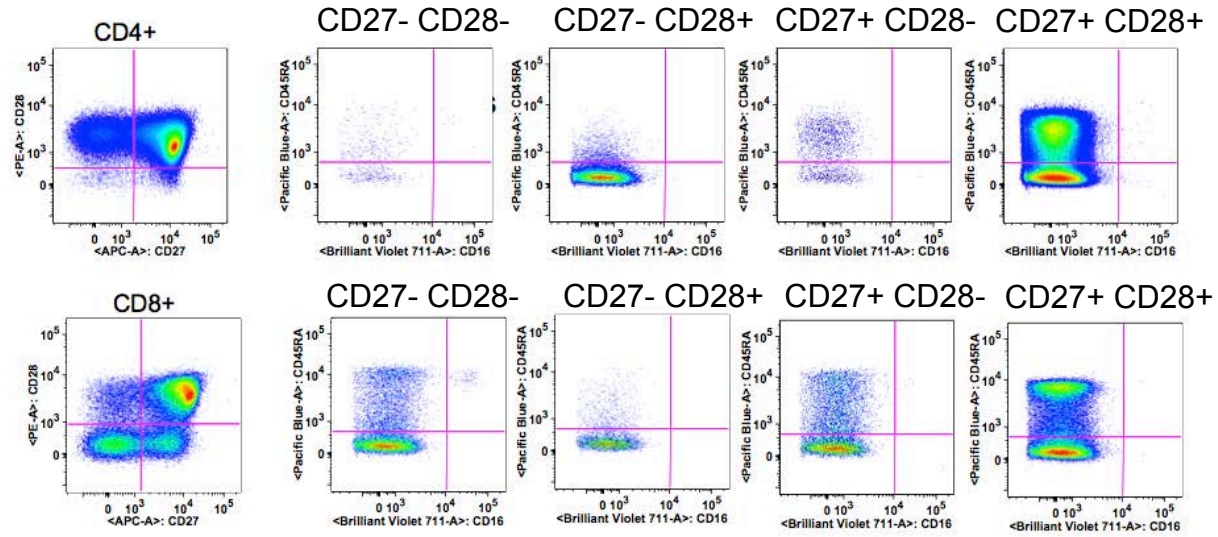

Supplement: 12979_2015_52_MOESM1_ESM.pdf [file 12979_2015_52_MOESM1_ESM.pdf]
